# Supplementary material for: Integrating high-content screening and ligand-target prediction to identify mechanism of action
Source: Springer Nature journal article supplement (doi:10.1038/nchembio.2007.53), 2007-12-09
Supplement: 41589_2008_BFnchembio200753_MOESM3_ESM.mol [file 41589_2008_BFnchembio200753_MOESM3_ESM.mol]

  Chem3D  11090712353D

124127  0  0  0  0  0  0  0  0999 V2000
   -0.4303   13.5763   -2.0277 C   0  0  0  0  0  0  0  0  0  0  0  0
   -0.4727   12.4627   -0.9725 C   0  0  0  0  0  0  0  0  0  0  0  0
   -0.6306   11.0749   -1.6134 C   0  0  0  0  0  0  0  0  0  0  0  0
   -0.6692    9.9520   -0.5639 C   0  0  0  0  0  0  0  0  0  0  0  0
   -0.8403    8.5697   -1.2156 C   0  0  0  0  0  0  0  0  0  0  0  0
   -0.7996    7.4328   -0.1799 C   0  0  0  0  0  0  0  0  0  0  0  0
   -0.9932    6.0302   -0.7979 C   0  0  1  0  0  0  0  0  0  0  0  0
   -0.0330    5.0271   -0.1355 C   0  0  0  0  0  0  0  0  0  0  0  0
   -0.2507    3.6372   -0.7394 C   0  0  0  0  0  0  0  0  0  0  0  0
   -1.7150    3.2180   -0.7546 C   0  0  2  0  0  0  0  0  0  0  0  0
   -1.8677    2.2913   -1.8188 O   0  0  0  0  0  0  0  0  0  0  0  0
   -2.5325    4.2261   -1.2904 O   0  0  0  0  0  0  0  0  0  0  0  0
   -2.4250    5.4843   -0.6842 C   0  0  2  0  0  0  0  0  0  0  0  0
   -3.4760    6.3797   -1.3438 C   0  0  0  0  0  0  0  0  0  0  0  0
   -2.2660    2.5725    0.5192 C   0  0  2  0  0  0  0  0  0  0  0  0
   -3.7512    2.2081    0.4389 C   0  0  0  0  0  0  0  0  0  0  0  0
   -2.0945    3.4311    1.6282 O   0  0  0  0  0  0  0  0  0  0  0  0
   -1.4542    1.3276    0.8586 C   0  0  0  0  0  0  0  0  0  0  0  0
   -0.7645    1.3098    1.8492 O   0  0  0  0  0  0  0  0  0  0  0  0
   -1.5566    0.3017   -0.0331 N   0  0  0  0  0  0  0  0  0  0  0  0
   -0.7440   -0.9173    0.0378 C   0  0  2  0  0  0  0  0  0  0  0  0
   -0.9930   -1.6824   -1.2774 C   0  0  2  0  0  0  0  0  0  0  0  0
   -0.7087   -3.1825   -1.3132 C   0  0  0  0  0  0  0  0  0  0  0  0
   -0.4513   -0.9741   -2.3589 O   0  0  0  0  0  0  0  0  0  0  0  0
    0.6985   -1.3255   -2.9986 C   0  0  0  0  0  0  0  0  0  0  0  0
    0.8868   -1.1123   -4.1782 O   0  0  0  0  0  0  0  0  0  0  0  0
    1.8867   -1.8391   -2.1734 C   0  0  2  0  0  0  0  0  0  0  0  0
    3.0579   -0.8456   -2.2771 C   0  0  0  0  0  0  0  0  0  0  0  0
    2.3055   -3.1571   -2.6772 N   0  0  0  0  0  0  0  0  0  0  0  0
    2.2589   -3.3646   -3.9857 O   0  0  0  0  0  0  0  0  0  0  0  0
    2.8014   -4.1064   -1.8011 C   0  0  0  0  0  0  0  0  0  0  0  0
    2.9784   -3.8880   -0.6236 O   0  0  0  0  0  0  0  0  0  0  0  0
    3.1750   -5.4649   -2.4206 C   0  0  1  0  0  0  0  0  0  0  0  0
    4.6003   -5.3193   -2.9918 C   0  0  0  0  0  0  0  0  0  0  0  0
    5.2018   -6.6816   -3.3495 C   0  0  0  0  0  0  0  0  0  0  0  0
    5.1432   -7.5721   -2.1050 C   0  0  0  0  0  0  0  0  0  0  0  0
    3.7549   -7.7317   -1.6893 N   0  0  0  0  0  0  0  0  0  0  0  0
    3.0935   -6.5632   -1.4406 N   0  0  0  0  0  0  0  0  0  0  0  0
    1.9387   -6.6583   -0.6869 C   0  0  0  0  0  0  0  0  0  0  0  0
    0.8964   -6.1491   -1.0283 O   0  0  0  0  0  0  0  0  0  0  0  0
    2.0689   -7.4238    0.6273 C   0  0  0  0  0  0  0  0  0  0  0  0
    1.7741   -6.5029    1.7269 N   0  0  0  0  0  0  0  0  0  0  0  0
    0.7954   -6.7140    2.6563 C   0  0  0  0  0  0  0  0  0  0  0  0
    0.0709   -7.6806    2.7003 O   0  0  0  0  0  0  0  0  0  0  0  0
    0.5752   -5.5669    3.6363 C   0  0  1  0  0  0  0  0  0  0  0  0
    1.6045   -4.4281    3.5996 C   0  0  0  0  0  0  0  0  0  0  0  0
    2.8850   -4.9684    3.8144 O   0  0  0  0  0  0  0  0  0  0  0  0
    3.8961   -3.9850    3.7945 C   0  0  0  0  0  0  0  0  0  0  0  0
   -0.8111   -5.1139    3.4771 N   0  0  0  0  0  0  0  0  0  0  0  0
   -1.7276   -5.9728    3.8972 O   0  0  0  0  0  0  0  0  0  0  0  0
   -1.0822   -4.4005    2.3300 C   0  0  0  0  0  0  0  0  0  0  0  0
   -0.4057   -4.5223    1.3369 O   0  0  0  0  0  0  0  0  0  0  0  0
   -2.3106   -3.4925    2.3616 C   0  0  1  0  0  0  0  0  0  0  0  0
   -2.7457   -2.9194    3.7184 C   0  0  0  0  0  0  0  0  0  0  0  0
   -4.0187   -2.0798    3.5021 C   0  0  0  0  0  0  0  0  0  0  0  0
   -3.8383   -1.0577    2.3656 C   0  0  0  0  0  0  0  0  0  0  0  0
   -3.3398   -1.6952    1.1438 N   0  0  0  0  0  0  0  0  0  0  0  0
   -2.1913   -2.3735    1.4140 N   0  0  0  0  0  0  0  0  0  0  0  0
   -0.9708   -1.7341    1.3104 C   0  0  0  0  0  0  0  0  0  0  0  0
   -0.1069   -1.8342    2.1527 O   0  0  0  0  0  0  0  0  0  0  0  0
   -0.3151   14.5759   -1.5485 H   0  0  0  0  0  0  0  0  0  0  0  0
    0.4243   13.4370   -2.7287 H   0  0  0  0  0  0  0  0  0  0  0  0
   -1.3679   13.5948   -2.6292 H   0  0  0  0  0  0  0  0  0  0  0  0
   -1.3242   12.6505   -0.2755 H   0  0  0  0  0  0  0  0  0  0  0  0
    0.4656   12.4923   -0.3684 H   0  0  0  0  0  0  0  0  0  0  0  0
    0.2198   10.8948   -2.3135 H   0  0  0  0  0  0  0  0  0  0  0  0
   -1.5697   11.0509   -2.2157 H   0  0  0  0  0  0  0  0  0  0  0  0
   -1.5113   10.1316    0.1461 H   0  0  0  0  0  0  0  0  0  0  0  0
    0.2770    9.9702    0.0278 H   0  0  0  0  0  0  0  0  0  0  0  0
   -0.0213    8.4136   -1.9580 H   0  0  0  0  0  0  0  0  0  0  0  0
   -1.8003    8.5488   -1.7797 H   0  0  0  0  0  0  0  0  0  0  0  0
   -1.5471    7.6037    0.6281 H   0  0  0  0  0  0  0  0  0  0  0  0
    0.1993    7.4914    0.3150 H   0  0  0  0  0  0  0  0  0  0  0  0
   -0.7228    6.0784   -1.8819 H   0  0  0  0  0  0  0  0  0  0  0  0
    1.0281    5.3367   -0.2933 H   0  0  0  0  0  0  0  0  0  0  0  0
   -0.1959    5.0118    0.9656 H   0  0  0  0  0  0  0  0  0  0  0  0
    0.3783    2.8820   -0.2154 H   0  0  0  0  0  0  0  0  0  0  0  0
    0.1269    3.6743   -1.7908 H   0  0  0  0  0  0  0  0  0  0  0  0
   -2.1927    2.7747   -2.5812 H   0  0  0  0  0  0  0  0  0  0  0  0
   -2.7133    5.3923    0.3876 H   0  0  0  0  0  0  0  0  0  0  0  0
   -3.5777    7.3568   -0.8210 H   0  0  0  0  0  0  0  0  0  0  0  0
   -4.4822    5.9006   -1.3133 H   0  0  0  0  0  0  0  0  0  0  0  0
   -3.2288    6.5715   -2.4124 H   0  0  0  0  0  0  0  0  0  0  0  0
   -3.9732    1.4959   -0.3866 H   0  0  0  0  0  0  0  0  0  0  0  0
   -4.0947    1.7345    1.3860 H   0  0  0  0  0  0  0  0  0  0  0  0
   -4.3853    3.1095    0.2831 H   0  0  0  0  0  0  0  0  0  0  0  0
   -1.5347    2.9823    2.2730 H   0  0  0  0  0  0  0  0  0  0  0  0
   -2.1708    0.4166   -0.8391 H   0  0  0  0  0  0  0  0  0  0  0  0
    0.3258   -0.5997    0.0662 H   0  0  0  0  0  0  0  0  0  0  0  0
   -2.1019   -1.6283   -1.4484 H   0  0  0  0  0  0  0  0  0  0  0  0
   -0.6762   -3.5765   -2.3543 H   0  0  0  0  0  0  0  0  0  0  0  0
   -1.5185   -3.7538   -0.8054 H   0  0  0  0  0  0  0  0  0  0  0  0
    0.2360   -3.4571   -0.8040 H   0  0  0  0  0  0  0  0  0  0  0  0
    1.6159   -1.8834   -1.0979 H   0  0  0  0  0  0  0  0  0  0  0  0
    2.7564    0.1657   -1.9180 H   0  0  0  0  0  0  0  0  0  0  0  0
    3.4160   -0.7427   -3.3270 H   0  0  0  0  0  0  0  0  0  0  0  0
    3.9242   -1.1788   -1.6610 H   0  0  0  0  0  0  0  0  0  0  0  0
    1.9104   -2.6280   -4.4602 H   0  0  0  0  0  0  0  0  0  0  0  0
    2.4658   -5.7181   -3.2448 H   0  0  0  0  0  0  0  0  0  0  0  0
    4.6080   -4.6584   -3.8898 H   0  0  0  0  0  0  0  0  0  0  0  0
    5.2558   -4.8351   -2.2284 H   0  0  0  0  0  0  0  0  0  0  0  0
    6.2559   -6.5645   -3.6971 H   0  0  0  0  0  0  0  0  0  0  0  0
    4.6201   -7.1468   -4.1805 H   0  0  0  0  0  0  0  0  0  0  0  0
    5.5711   -8.5766   -2.3350 H   0  0  0  0  0  0  0  0  0  0  0  0
    5.7431   -7.1340   -1.2729 H   0  0  0  0  0  0  0  0  0  0  0  0
    3.2471   -8.2406   -2.4355 H   0  0  0  0  0  0  0  0  0  0  0  0
    3.0995   -7.8113    0.7901 H   0  0  0  0  0  0  0  0  0  0  0  0
    1.3724   -8.2921    0.6047 H   0  0  0  0  0  0  0  0  0  0  0  0
    2.2958   -5.6262    1.7713 H   0  0  0  0  0  0  0  0  0  0  0  0
    0.6626   -6.0327    4.6514 H   0  0  0  0  0  0  0  0  0  0  0  0
    1.3732   -3.6935    4.4057 H   0  0  0  0  0  0  0  0  0  0  0  0
    1.6022   -3.8949    2.6236 H   0  0  0  0  0  0  0  0  0  0  0  0
    4.8693   -4.4917    3.9819 H   0  0  0  0  0  0  0  0  0  0  0  0
    3.9347   -3.4916    2.7980 H   0  0  0  0  0  0  0  0  0  0  0  0
    3.7217   -3.2348    4.5975 H   0  0  0  0  0  0  0  0  0  0  0  0
   -1.5031   -6.8440    3.5969 H   0  0  0  0  0  0  0  0  0  0  0  0
   -3.1305   -4.1592    1.9925 H   0  0  0  0  0  0  0  0  0  0  0  0
   -2.9544   -3.7267    4.4580 H   0  0  0  0  0  0  0  0  0  0  0  0
   -1.9351   -2.2798    4.1392 H   0  0  0  0  0  0  0  0  0  0  0  0
   -4.2959   -1.5566    4.4482 H   0  0  0  0  0  0  0  0  0  0  0  0
   -4.8657   -2.7602    3.2429 H   0  0  0  0  0  0  0  0  0  0  0  0
   -4.8124   -0.5619    2.1430 H   0  0  0  0  0  0  0  0  0  0  0  0
   -3.1271   -0.2624    2.6934 H   0  0  0  0  0  0  0  0  0  0  0  0
   -4.0529   -2.3517    0.7811 H   0  0  0  0  0  0  0  0  0  0  0  0
  1  2  1  0      
  1 61  1  0      
  1 62  1  0      
  1 63  1  0      
  2  3  1  0      
  2 64  1  0      
  2 65  1  0      
  3  4  1  0      
  3 66  1  0      
  3 67  1  0      
  4  5  1  0      
  4 68  1  0      
  4 69  1  0      
  5  6  1  0      
  5 70  1  0      
  5 71  1  0      
  6  7  1  0      
  6 72  1  0      
  6 73  1  0      
  7  8  1  0      
  7 13  1  0      
  7 74  1  0      
  8  9  1  0      
  8 75  1  0      
  8 76  1  0      
  9 10  1  0      
  9 77  1  0      
  9 78  1  0      
 10 11  1  0      
 10 12  1  0      
 10 15  1  0      
 11 79  1  0      
 12 13  1  0      
 13 14  1  0      
 13 80  1  0      
 14 81  1  0      
 14 82  1  0      
 14 83  1  0      
 15 16  1  0      
 15 17  1  0      
 15 18  1  0      
 16 84  1  0      
 16 85  1  0      
 16 86  1  0      
 17 87  1  0      
 18 19  2  0      
 18 20  1  0      
 20 21  1  0      
 20 88  1  0      
 21 22  1  0      
 21 59  1  0      
 21 89  1  0      
 22 23  1  0      
 22 24  1  0      
 22 90  1  0      
 23 91  1  0      
 23 92  1  0      
 23 93  1  0      
 24 25  1  0      
 25 26  2  0      
 25 27  1  0      
 27 28  1  0      
 27 29  1  0      
 27 94  1  0      
 28 95  1  0      
 28 96  1  0      
 28 97  1  0      
 29 30  1  0      
 29 31  1  0      
 30 98  1  0      
 31 32  2  0      
 31 33  1  0      
 33 34  1  0      
 33 38  1  0      
 33 99  1  0      
 34 35  1  0      
 34100  1  0      
 34101  1  0      
 35 36  1  0      
 35102  1  0      
 35103  1  0      
 36 37  1  0      
 36104  1  0      
 36105  1  0      
 37 38  1  0      
 37106  1  0      
 38 39  1  0      
 39 40  2  0      
 39 41  1  0      
 41 42  1  0      
 41107  1  0      
 41108  1  0      
 42 43  1  0      
 42109  1  0      
 43 44  2  0      
 43 45  1  0      
 45 46  1  0      
 45 49  1  0      
 45110  1  0      
 46 47  1  0      
 46111  1  0      
 46112  1  0      
 47 48  1  0      
 48113  1  0      
 48114  1  0      
 48115  1  0      
 49 50  1  0      
 49 51  1  0      
 50116  1  0      
 51 52  2  0      
 51 53  1  0      
 53 54  1  0      
 53 58  1  0      
 53117  1  0      
 54 55  1  0      
 54118  1  0      
 54119  1  0      
 55 56  1  0      
 55120  1  0      
 55121  1  0      
 56 57  1  0      
 56122  1  0      
 56123  1  0      
 57 58  1  0      
 57124  1  0      
 58 59  1  0      
 59 60  2  0      
M  END
