# Supplementary material for: Integrating high-content screening and ligand-target prediction to identify mechanism of action
Source: Springer Nature journal article supplement (doi:10.1038/nchembio.2007.53), 2007-12-09
Supplement: 41589_2008_BFnchembio200753_MOESM23_ESM.mol [file 41589_2008_BFnchembio200753_MOESM23_ESM.mol]

  Chem3D  11090712403D

 75 79  0  0  0  0  0  0  0  0999 V2000
    4.6312   -0.8007   -2.6575 C   0  0  0  0  0  0  0  0  0  0  0  0
    3.6624   -0.1164   -1.6818 C   0  0  0  0  0  0  0  0  0  0  0  0
    2.4181   -0.9509   -1.3020 C   0  0  1  0  0  0  0  0  0  0  0  0
    2.8171   -2.3331   -0.7470 C   0  0  0  0  0  0  0  0  0  0  0  0
    1.6637   -3.1451   -0.3861 N   0  0  0  0  0  0  0  0  0  0  0  0
    2.0671   -4.4906   -0.0109 C   0  0  0  0  0  0  0  0  0  0  0  0
    0.8319   -5.3961    0.0387 C   0  0  0  0  0  0  0  0  0  0  0  0
   -0.2509   -4.7782    0.8788 C   0  0  0  0  0  0  0  0  0  0  0  0
   -1.2942   -5.5629    1.3704 C   0  0  0  0  0  0  0  0  0  0  0  0
   -2.3340   -5.0789    2.1764 C   0  0  0  0  0  0  0  0  0  0  0  0
   -3.2629   -6.0085    2.5863 O   0  0  0  0  0  0  0  0  0  0  0  0
   -4.0352   -5.7864    3.7415 C   0  0  0  0  0  0  0  0  0  0  0  0
   -2.2687   -3.7245    2.5737 C   0  0  0  0  0  0  0  0  0  0  0  0
   -3.2443   -3.1981    3.3842 O   0  0  0  0  0  0  0  0  0  0  0  0
   -3.3097   -1.8057    3.5853 C   0  0  0  0  0  0  0  0  0  0  0  0
   -1.2198   -2.9480    2.0519 C   0  0  0  0  0  0  0  0  0  0  0  0
   -0.2235   -3.4180    1.1891 C   0  0  0  0  0  0  0  0  0  0  0  0
    0.8843   -2.5092    0.6717 C   0  0  2  0  0  0  0  0  0  0  0  0
    0.3640   -1.1608    0.1420 C   0  0  0  0  0  0  0  0  0  0  0  0
    1.5019   -0.2188   -0.2928 C   0  0  2  0  0  0  0  0  0  0  0  0
    0.9417    1.1118   -0.8490 C   0  0  0  0  0  0  0  0  0  0  0  0
   -0.0268    1.8855    0.0722 C   0  0  1  0  0  0  0  0  0  0  0  0
    0.5956    2.0012    1.3934 N   0  0  0  0  0  0  0  0  0  0  0  0
   -0.1043    2.9123    2.2908 C   0  0  0  0  0  0  0  0  0  0  0  0
    0.0578    4.3375    1.7577 C   0  0  0  0  0  0  0  0  0  0  0  0
   -0.3414    4.4032    0.3066 C   0  0  0  0  0  0  0  0  0  0  0  0
   -0.6782    5.6259   -0.2746 C   0  0  0  0  0  0  0  0  0  0  0  0
   -1.0842    5.7856   -1.6073 C   0  0  0  0  0  0  0  0  0  0  0  0
   -1.3905    7.0724   -1.9892 O   0  0  0  0  0  0  0  0  0  0  0  0
   -2.1503    7.3213   -3.1466 C   0  0  0  0  0  0  0  0  0  0  0  0
   -1.2233    4.6164   -2.3892 C   0  0  0  0  0  0  0  0  0  0  0  0
   -1.6504    4.7032   -3.6912 O   0  0  0  0  0  0  0  0  0  0  0  0
   -1.6607    3.5529   -4.5035 C   0  0  0  0  0  0  0  0  0  0  0  0
   -0.8637    3.3960   -1.7924 C   0  0  0  0  0  0  0  0  0  0  0  0
   -0.3997    3.2514   -0.4811 C   0  0  0  0  0  0  0  0  0  0  0  0
    5.4125   -0.0863   -3.0065 H   0  0  0  0  0  0  0  0  0  0  0  0
    5.1720   -1.6507   -2.1847 H   0  0  0  0  0  0  0  0  0  0  0  0
    4.0951   -1.1788   -3.5578 H   0  0  0  0  0  0  0  0  0  0  0  0
    3.3395    0.8309   -2.1741 H   0  0  0  0  0  0  0  0  0  0  0  0
    4.2180    0.1663   -0.7564 H   0  0  0  0  0  0  0  0  0  0  0  0
    1.8256   -1.1261   -2.2353 H   0  0  0  0  0  0  0  0  0  0  0  0
    3.3908   -2.8692   -1.5392 H   0  0  0  0  0  0  0  0  0  0  0  0
    3.5004   -2.2049    0.1252 H   0  0  0  0  0  0  0  0  0  0  0  0
    2.7720   -4.9250   -0.7603 H   0  0  0  0  0  0  0  0  0  0  0  0
    2.5952   -4.4874    0.9722 H   0  0  0  0  0  0  0  0  0  0  0  0
    1.1161   -6.3956    0.4442 H   0  0  0  0  0  0  0  0  0  0  0  0
    0.4249   -5.5438   -0.9900 H   0  0  0  0  0  0  0  0  0  0  0  0
   -1.2997   -6.6343    1.1068 H   0  0  0  0  0  0  0  0  0  0  0  0
   -4.5490   -6.7418    3.9917 H   0  0  0  0  0  0  0  0  0  0  0  0
   -3.3823   -5.5118    4.5995 H   0  0  0  0  0  0  0  0  0  0  0  0
   -4.8277   -5.0320    3.5451 H   0  0  0  0  0  0  0  0  0  0  0  0
   -4.2142   -1.5957    4.1994 H   0  0  0  0  0  0  0  0  0  0  0  0
   -2.4225   -1.4521    4.1560 H   0  0  0  0  0  0  0  0  0  0  0  0
   -3.4216   -1.2772    2.6122 H   0  0  0  0  0  0  0  0  0  0  0  0
   -1.1475   -1.8941    2.3506 H   0  0  0  0  0  0  0  0  0  0  0  0
    1.5443   -2.3144    1.5538 H   0  0  0  0  0  0  0  0  0  0  0  0
   -0.3245   -1.3434   -0.7164 H   0  0  0  0  0  0  0  0  0  0  0  0
   -0.2221   -0.6464    0.9342 H   0  0  0  0  0  0  0  0  0  0  0  0
    2.1214    0.0074    0.6104 H   0  0  0  0  0  0  0  0  0  0  0  0
    1.7862    1.8085   -1.0604 H   0  0  0  0  0  0  0  0  0  0  0  0
    0.4485    0.8825   -1.8215 H   0  0  0  0  0  0  0  0  0  0  0  0
   -0.9868    1.3242    0.1759 H   0  0  0  0  0  0  0  0  0  0  0  0
    1.5795    2.3474    1.2691 H   0  0  0  0  0  0  0  0  0  0  0  0
    0.3369    2.8379    3.3128 H   0  0  0  0  0  0  0  0  0  0  0  0
   -1.1803    2.6289    2.3685 H   0  0  0  0  0  0  0  0  0  0  0  0
   -0.5620    5.0362    2.3672 H   0  0  0  0  0  0  0  0  0  0  0  0
    1.1231    4.6594    1.8384 H   0  0  0  0  0  0  0  0  0  0  0  0
   -0.6208    6.5278    0.3584 H   0  0  0  0  0  0  0  0  0  0  0  0
   -2.3964    8.4070   -3.1599 H   0  0  0  0  0  0  0  0  0  0  0  0
   -1.5530    7.1101   -4.0602 H   0  0  0  0  0  0  0  0  0  0  0  0
   -3.1070    6.7547   -3.1139 H   0  0  0  0  0  0  0  0  0  0  0  0
   -1.9988    3.8600   -5.5187 H   0  0  0  0  0  0  0  0  0  0  0  0
   -2.3889    2.8076   -4.1130 H   0  0  0  0  0  0  0  0  0  0  0  0
   -0.6346    3.1318   -4.5941 H   0  0  0  0  0  0  0  0  0  0  0  0
   -0.9578    2.4679   -2.3728 H   0  0  0  0  0  0  0  0  0  0  0  0
  1  2  1  0      
  1 36  1  0      
  1 37  1  0      
  1 38  1  0      
  3  2  1  0      
  2 39  1  0      
  2 40  1  0      
  3  4  1  0      
  3 20  1  0      
  3 41  1  0      
  4  5  1  0      
  4 42  1  0      
  4 43  1  0      
  5  6  1  0      
  5 18  1  0      
  6  7  1  0      
  6 44  1  0      
  6 45  1  0      
  7  8  1  0      
  7 46  1  0      
  7 47  1  0      
  8  9  1  0      
  8 17  2  0      
  9 10  2  0      
  9 48  1  0      
 10 11  1  0      
 10 13  1  0      
 11 12  1  0      
 12 49  1  0      
 12 50  1  0      
 12 51  1  0      
 13 14  1  0      
 13 16  2  0      
 14 15  1  0      
 15 52  1  0      
 15 53  1  0      
 15 54  1  0      
 16 17  1  0      
 16 55  1  0      
 17 18  1  0      
 18 19  1  0      
 18 56  1  0      
 19 20  1  0      
 19 57  1  0      
 19 58  1  0      
 20 21  1  0      
 20 59  1  0      
 22 21  1  0      
 21 60  1  0      
 21 61  1  0      
 22 23  1  0      
 22 35  1  0      
 22 62  1  0      
 23 24  1  0      
 23 63  1  0      
 24 25  1  0      
 24 64  1  0      
 24 65  1  0      
 25 26  1  0      
 25 66  1  0      
 25 67  1  0      
 26 27  1  0      
 26 35  2  0      
 27 28  2  0      
 27 68  1  0      
 28 29  1  0      
 28 31  1  0      
 29 30  1  0      
 30 69  1  0      
 30 70  1  0      
 30 71  1  0      
 31 32  1  0      
 31 34  2  0      
 32 33  1  0      
 33 72  1  0      
 33 73  1  0      
 33 74  1  0      
 34 35  1  0      
 34 75  1  0      
M  END
