# Supplementary material for: Integrating high-content screening and ligand-target prediction to identify mechanism of action
Source: Springer Nature journal article supplement (doi:10.1038/nchembio.2007.53), 2007-12-09
Supplement: 41589_2008_BFnchembio200753_MOESM31_ESM.mol [file 41589_2008_BFnchembio200753_MOESM31_ESM.mol]

  Chem3D  11090712423D

 60 63  0  0  0  0  0  0  0  0999 V2000
    0.8192   -1.8286   -0.7933 C   0  0  2  0  0  0  0  0  0  0  0  0
    2.2024   -2.0941   -1.3991 C   0  0  0  0  0  0  0  0  0  0  0  0
    3.1495   -0.9133   -1.1309 C   0  0  0  0  0  0  0  0  0  0  0  0
    2.4550    0.4169   -1.3806 C   0  0  0  0  0  0  0  0  0  0  0  0
    2.7784    1.1001   -2.5485 C   0  0  0  0  0  0  0  0  0  0  0  0
    2.1937    2.3157   -2.9103 C   0  0  0  0  0  0  0  0  0  0  0  0
    1.1703    2.8359   -2.0863 C   0  0  0  0  0  0  0  0  0  0  0  0
    0.8341    2.1766   -0.8746 C   0  0  0  0  0  0  0  0  0  0  0  0
    1.4854    0.9671   -0.5252 C   0  0  0  0  0  0  0  0  0  0  0  0
    1.2017    0.1838    0.7300 C   0  0  0  0  0  0  0  0  0  0  0  0
    1.3899    0.9058    1.8928 C   0  0  0  0  0  0  0  0  0  0  0  0
    0.8739    0.6533    3.2286 C   0  0  0  0  0  0  0  0  0  0  0  0
    0.3307   -0.6133    3.2597 C   0  0  0  0  0  0  0  0  0  0  0  0
   -1.0334   -0.7956    3.0901 N   0  0  0  0  0  0  0  0  0  0  0  0
   -1.6641   -2.1293    2.8763 C   0  0  0  0  0  0  0  0  0  0  0  0
   -3.1653   -2.0819    2.8477 C   0  0  0  0  0  0  0  0  0  0  0  0
   -3.9109   -3.2267    2.8980 O   0  0  0  0  0  0  0  0  0  0  0  0
   -5.2165   -2.8486    2.8457 C   0  0  0  0  0  0  0  0  0  0  0  0
   -5.3202   -1.4944    2.7630 C   0  0  0  0  0  0  0  0  0  0  0  0
   -3.9808   -0.9933    2.7540 C   0  0  0  0  0  0  0  0  0  0  0  0
    1.2780   -1.7669    3.0357 C   0  0  0  0  0  0  0  0  0  0  0  0
    1.8127   -2.3843    3.9469 O   0  0  0  0  0  0  0  0  0  0  0  0
    1.2422   -2.1448    1.6198 C   0  0  0  0  0  0  0  0  0  0  0  0
    0.9968   -1.2644    0.6059 C   0  0  0  0  0  0  0  0  0  0  0  0
    0.0297   -3.0694   -0.7918 N   0  0  0  0  0  0  0  0  0  0  0  0
   -1.2666   -3.0287   -1.4722 C   0  0  0  0  0  0  0  0  0  0  0  0
    2.6107    2.8298   -4.1255 O   0  0  0  0  0  0  0  0  0  0  0  0
    1.7185    3.5592   -4.9365 C   0  0  0  0  0  0  0  0  0  0  0  0
    0.6185    4.0140   -2.5298 O   0  0  0  0  0  0  0  0  0  0  0  0
   -0.2932    4.7913   -1.8023 C   0  0  0  0  0  0  0  0  0  0  0  0
   -0.1961    2.7511   -0.1707 O   0  0  0  0  0  0  0  0  0  0  0  0
   -0.9374    2.1467    0.8608 C   0  0  0  0  0  0  0  0  0  0  0  0
    0.2847   -1.0627   -1.4052 H   0  0  0  0  0  0  0  0  0  0  0  0
    2.0865   -2.2618   -2.4942 H   0  0  0  0  0  0  0  0  0  0  0  0
    2.6547   -3.0133   -0.9670 H   0  0  0  0  0  0  0  0  0  0  0  0
    4.0567   -1.0281   -1.7807 H   0  0  0  0  0  0  0  0  0  0  0  0
    3.5392   -0.9203   -0.0828 H   0  0  0  0  0  0  0  0  0  0  0  0
    3.5353    0.6659   -3.2350 H   0  0  0  0  0  0  0  0  0  0  0  0
    1.9133    1.8753    1.7825 H   0  0  0  0  0  0  0  0  0  0  0  0
    1.8307    0.6132    3.7802 H   0  0  0  0  0  0  0  0  0  0  0  0
   -1.6411    0.0633    3.1089 H   0  0  0  0  0  0  0  0  0  0  0  0
   -1.3319   -2.5407    1.8970 H   0  0  0  0  0  0  0  0  0  0  0  0
   -1.3390   -2.8163    3.6908 H   0  0  0  0  0  0  0  0  0  0  0  0
   -5.9694   -3.6369    2.8826 H   0  0  0  0  0  0  0  0  0  0  0  0
   -6.2504   -0.9148    2.7088 H   0  0  0  0  0  0  0  0  0  0  0  0
   -3.6940    0.0556    2.6884 H   0  0  0  0  0  0  0  0  0  0  0  0
    1.4263   -3.2073    1.3980 H   0  0  0  0  0  0  0  0  0  0  0  0
    0.6065   -3.8289   -1.2286 H   0  0  0  0  0  0  0  0  0  0  0  0
   -2.0925   -3.0209   -0.7269 H   0  0  0  0  0  0  0  0  0  0  0  0
   -1.3926   -2.1611   -2.1533 H   0  0  0  0  0  0  0  0  0  0  0  0
   -1.3769   -3.9421   -2.0985 H   0  0  0  0  0  0  0  0  0  0  0  0
    2.1424    3.5956   -5.9673 H   0  0  0  0  0  0  0  0  0  0  0  0
    1.6390    4.6181   -4.5984 H   0  0  0  0  0  0  0  0  0  0  0  0
    0.7325    3.0402   -4.9856 H   0  0  0  0  0  0  0  0  0  0  0  0
   -0.4782    5.7154   -2.3923 H   0  0  0  0  0  0  0  0  0  0  0  0
    0.1409    5.1098   -0.8322 H   0  0  0  0  0  0  0  0  0  0  0  0
   -1.2746    4.2799   -1.7218 H   0  0  0  0  0  0  0  0  0  0  0  0
   -1.9415    2.6324    0.8989 H   0  0  0  0  0  0  0  0  0  0  0  0
   -1.0959    1.0636    0.6921 H   0  0  0  0  0  0  0  0  0  0  0  0
   -0.5004    2.4156    1.8470 H   0  0  0  0  0  0  0  0  0  0  0  0
  1  2  1  0      
  1 24  1  0      
 25  1  1  0      
  1 33  1  0      
  2  3  1  0      
  2 34  1  0      
  2 35  1  0      
  3  4  1  0      
  3 36  1  0      
  3 37  1  0      
  4  5  1  0      
  4  9  2  0      
  5  6  2  0      
  5 38  1  0      
  6  7  1  0      
  6 27  1  0      
  7  8  2  0      
  7 29  1  0      
  8  9  1  0      
  8 31  1  0      
  9 10  1  0      
 10 11  2  0      
 10 24  1  0      
 11 12  1  0      
 11 39  1  0      
 12 13  2  0      
 12 40  1  0      
 13 14  1  0      
 13 21  1  0      
 14 15  1  0      
 14 41  1  0      
 15 16  1  0      
 15 42  1  0      
 15 43  1  0      
 16 17  1  0      
 16 20  2  0      
 17 18  1  0      
 18 19  2  0      
 18 44  1  0      
 19 20  1  0      
 19 45  1  0      
 20 46  1  0      
 21 22  2  0      
 21 23  1  0      
 23 24  2  0      
 23 47  1  0      
 25 26  1  0      
 25 48  1  0      
 26 49  1  0      
 26 50  1  0      
 26 51  1  0      
 27 28  1  0      
 28 52  1  0      
 28 53  1  0      
 28 54  1  0      
 29 30  1  0      
 30 55  1  0      
 30 56  1  0      
 30 57  1  0      
 31 32  1  0      
 32 58  1  0      
 32 59  1  0      
 32 60  1  0      
M  END
